# Supplementary material for: Dual-Exciting Central Carbon Nanoclusters for the Dual-Channel Detection of Hemin
Source: MDPI journal article supplement (doi:10.3390/inorganics11060226), 2023-05-25
Supplement: s1 [file s1]

# Supporting Information

## **Dual-Exciting Central Carbon Nanoclusters for the Dual-Channel Detection of Hemin**

Ya-Ting Gao <sup>1</sup>, Shuai Chang <sup>1</sup>, Bin-Bin Chen <sup>1,2,\*</sup> and Da-Wei Li <sup>1,\*</sup>

<sup>1</sup> Key Laboratory for Advanced Materials, Shanghai Key Laboratory of Functional Materials Chemistry, Frontiers Science Center for Materiobiology & Dynamic Chemistry, School of Chemistry & Molecular Engineering, East China University of Science and Technology, Shanghai 200237, China

<sup>2</sup> School of Science and Engineering, Shenzhen Institute of Aggregate Science and Technology, The Chinese University of Hong Kong, Shenzhen, 2001 Longxiang Boulevard, Longgang District, Shenzhen 518172, China

\* Correspondence: chenbinbin\_swu@163.com (B.-B.C.); daweili@ecust.edu.cn (D.-W.L.)

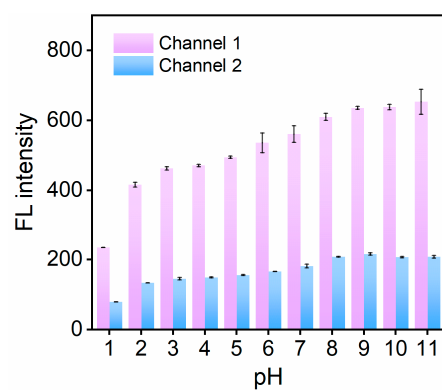

**Figure S1.** Effect of solution pH on FL emissions of CNCs at two channels. Excitations: 260 nm (channel 1) and 410 nm (channel 2).

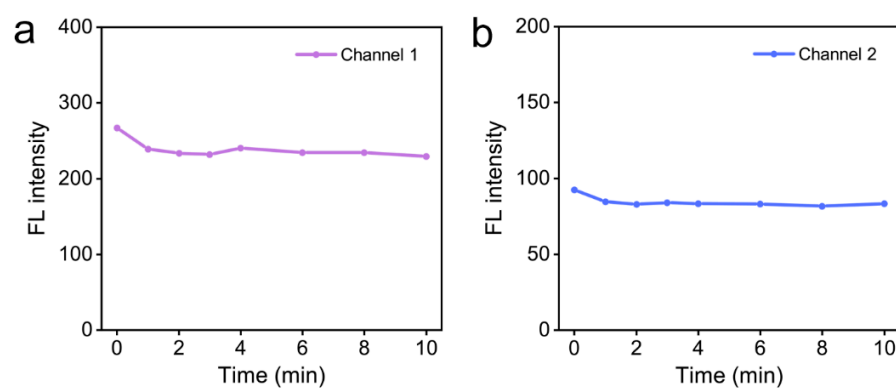

**Figure S2.** Relationship between FL intensity and incubation time. Excitations at (a) 260 nm (channel 1) and (b) 410 nm (channel 2).

**Table. S1.** The comparison of the determination of hemin.

| Hemin Probes                       | Sensing Method | Linear Range                                                    | LODs                                   | Ref.      |
|------------------------------------|----------------|-----------------------------------------------------------------|----------------------------------------|-----------|
| Atemisin-thiamine                  | Single-channel | 2 – 300 nM                                                      | 0.68 nM                                | 1         |
| Artesunate-luminol                 | Single-channel | 0.8 – 1000 nM                                                   | 0.22 nM                                | 2         |
| Gold nanoclusters                  | Single-channel | 1 – 25 nM                                                       | 0.43 nM                                | 3         |
| Graphene and aptamer nanocomposite | Single-channel | 1 – 150 nM                                                      | 0.64 nM                                | 4         |
| Silicon nanoparticle               | Single-channel | 0.05 – 100 $\mu$ M                                              | 29.5 nM                                | 5         |
| Protoporphyrin IX                  | Single-channel | 50 – 2250 nM                                                    | 36 nM                                  | 6         |
| Graphitic carbon nitride           | Single-channel | 0.5 – 25 $\mu$ M                                                | 0.15 $\mu$ M                           | 7         |
| Dual-exciting central CNCs         | Dual-channel   | 0.075 – 10 $\mu$ M (channel 1)<br>0.25 – 10 $\mu$ M (channel 2) | 30 nM (channel 1)<br>90 nM (channel 2) | This work |

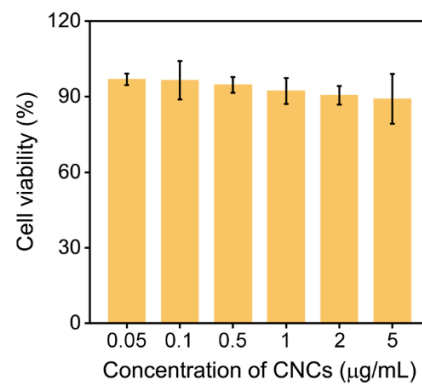

**Figure S3.** The biocompatibility of the CNCs. Error bars represent  $\pm$  S.D (n = 3).

## REFERENCES

1. P. Ni, C. Chen, Y. Jiang, Y. Lu and W. Chen, *Sens. Actuators B-Chem.*, 2018, **273**, 198-203.
2. T. H. Fereja, S. A. Kitte, W. Gao, F. Yuan, D. Snizhko, L. Qi, A. Nsabimana, Z. Liu and G. Xu, *Talanta*, 2019, **204**, 379-385.
3. S. L. Fereja, Z. Fang, P. Li, J. Guo, T. H. Fereja and W. Chen, *Anal. Bioanal. Chem.*, 2021, **413**, 1639-1649.
4. L. Gao, Y. Xiao, Y. Wang, X. Chen, B. Zhou and X. Yang, *Talanta*, 2015, **132**, 215-221.
5. N. Du, H. Zhang, J. Wang, X. Dong, J. Li, K. Wang and R. Guan, *Anal. Bioanal. Chem.*, 2022, **414**, 8223-8232.
6. B. H. Kang, N. Li, S. G. Liu, N. B. Li and H. Q. Luo, *Anal. Sci.*, 2016, **32**, 887-892.
7. Z. Guo, B. Li, Y. Zhang, Q. Zhao, J. Zhao, L. Li, L. Feng, M. Wang, X. Meng and G. Zuo, *ChemistrySelect*, 2019, **4**, 8178-8182.
